# Supplementary material for: Acinar ATP8b1/LPC pathway promotes macrophage efferocytosis and clearance of inflammation during chronic pancreatitis development
Source: PubMed Central journal article supplement (PMC9588032; doi:10.1038/s41419-022-05322-6), 2022-10-22

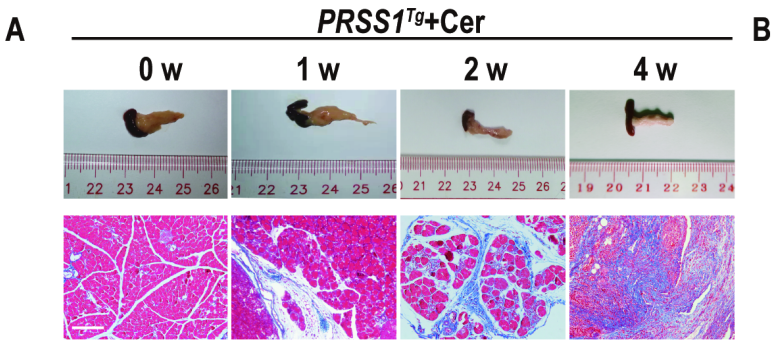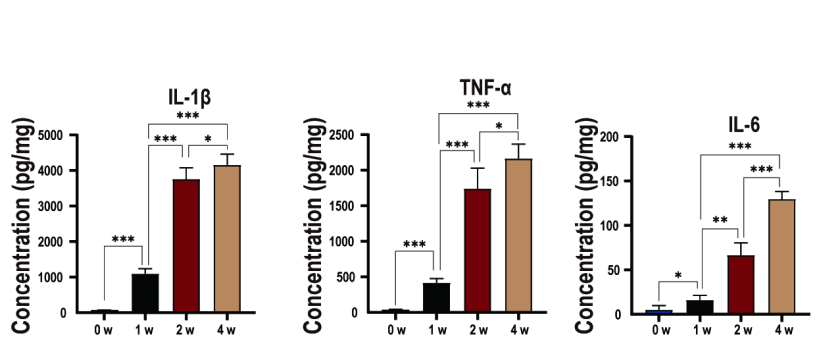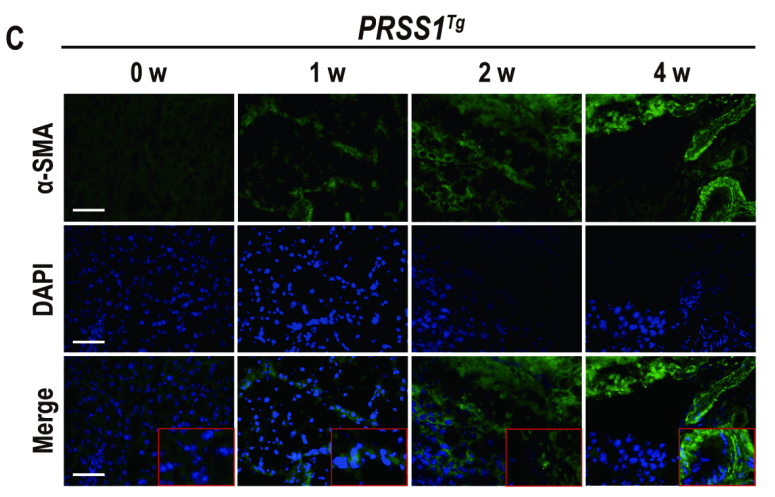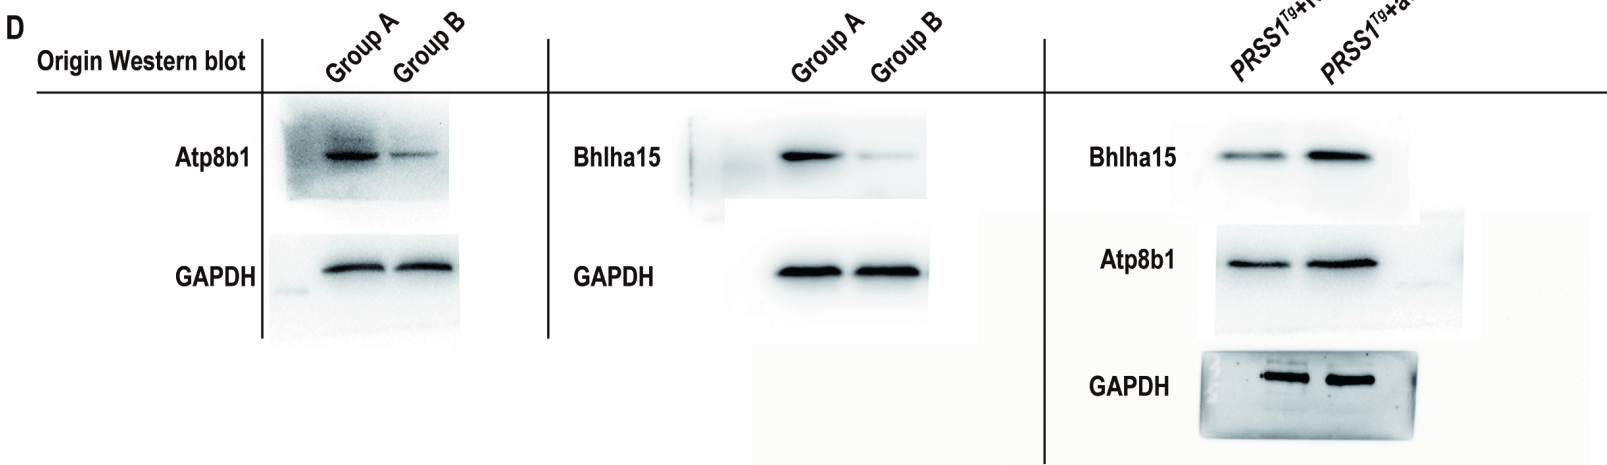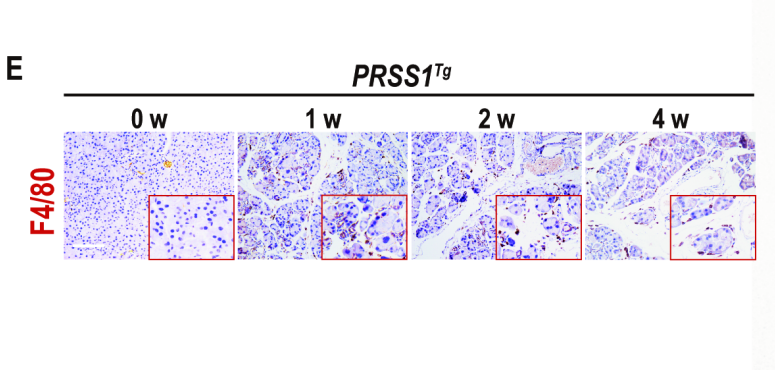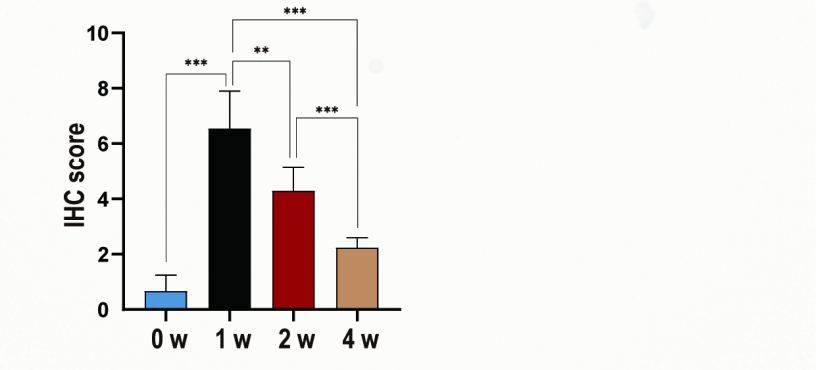

Supplement: 41419_2022_5322_MOESM3_ESM.pdf [file 41419_2022_5322_MOESM3_ESM.pdf]
