# Supplementary material for: Acinar ATP8b1/LPC pathway promotes macrophage efferocytosis and clearance of inflammation during chronic pancreatitis development
Source: PubMed Central journal article supplement (PMC9588032; doi:10.1038/s41419-022-05322-6), 2022-10-22

# A

## ssAAV.CAG.mAtp8b1-3FLAG.PA48

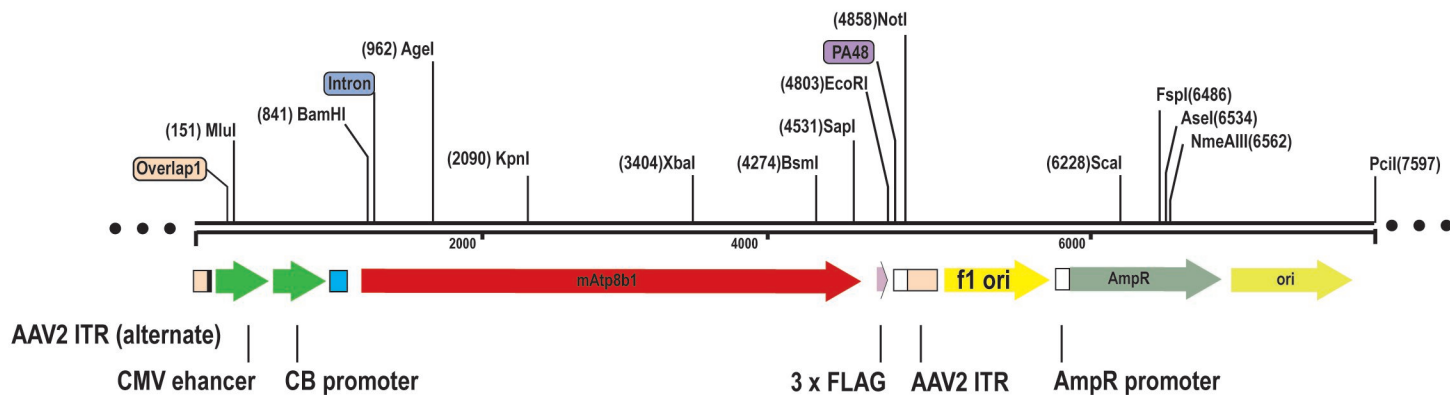

## ssAAV.CAG.EGFP.WPRE.SV40pA

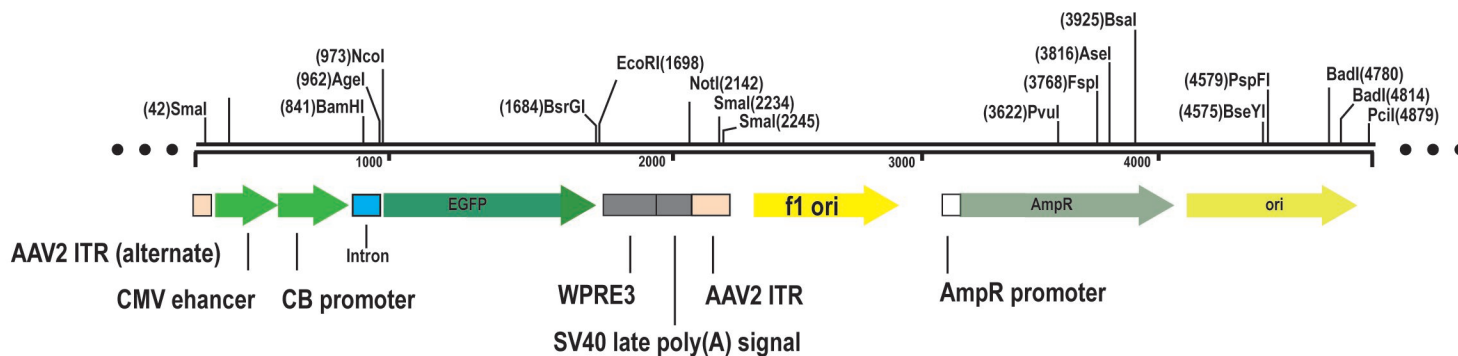

### B

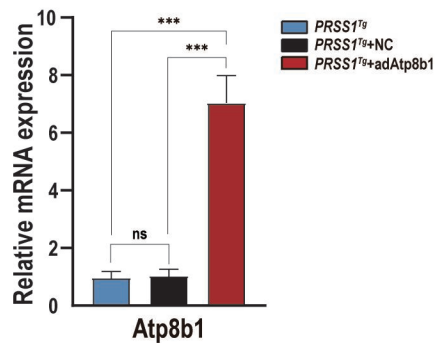

### C

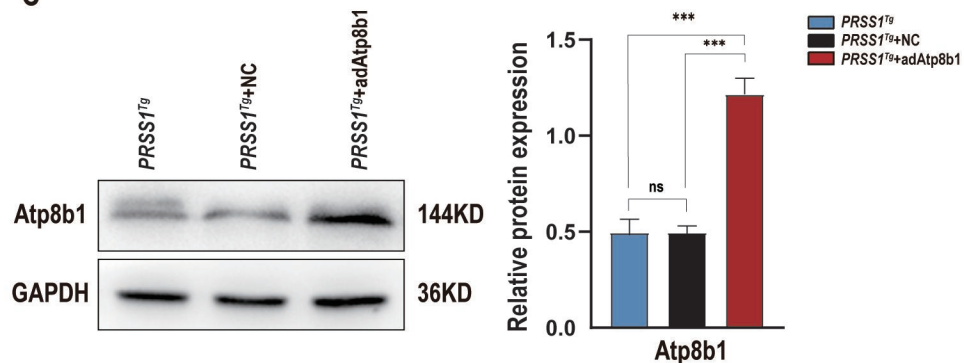

Supplement: 41419_2022_5322_MOESM5_ESM.pdf [file 41419_2022_5322_MOESM5_ESM.pdf]
