# Supplementary material for: Acinar ATP8b1/LPC pathway promotes macrophage efferocytosis and clearance of inflammation during chronic pancreatitis development
Source: PubMed Central journal article supplement (PMC9588032; doi:10.1038/s41419-022-05322-6), 2022-10-22

A

chr:64660463-64661642

&gt;Atp8b1-promoter-WT

GCTT GCCCTTTGCCAACCATGGACCATGGCGGGGCAGAGGCTTCCGGCA  
 CCACCGCCCGCCGCCAAACACCACTTGTCCAGGTT CAGGAGCCGAG  
 GGTGCGGACAGCTG T GCTACCGCACCGCAGCTGCTGAAATCCACTAGC  
 CCGTGGATCACCCTAGGGAGCCAGGGACCCCTGCCTGGCTGGTGGGTCC  
 TGGAGTTCGGAGAACAGCAGCGCCTCGCCCTCTTACCTAGTCTCACTG  
 GGCCCGGCTTGGGCATCCGCGGGGTGCGCGGCGCTCCGAGGCTTGTCCG  
 AGGCTGGTGGCACCTGCCACCTCCGCGCCGGCCCGGCGCTGCGGCTG  
 CGCTAGCGCTGCATGCCACACAGGGGCTGCCGCGGGCCCGGGAAGCCT  
 GTCCAGTTGCCCGGACTCCTCAGGCTCTCGTGGCTCGCCAAGGGCTCCC  
 CGCCTTCCCCCGCCCGCGCTCCGTGCGCCCTTCTAGGCGCAGCCCTT  
 TTCCTCCGCTCTGCCCGACCGGACAAACTGGTTTCTCTGCTCCAGGGAG  
 GAGCCTCTCGCCTCCCCGTCAGCGGCGCTGCCGCGCTCGGCTTGGGG  
 ACCAGGCTGGAGCTGGGCGCGGGGCGGTCCGCGCTCCGCTCCCTCG  
 ATCCCTCCCCGGGTGGAGAGAGGCTGGGCCGCCAGGCTGGGGTGTGTG  
 TACGGAGTCTGCTTCACTGACACGATCTAGGGCTCAGAGGCGAGTGC  
 AACCCCTGACTGTGACCGATCTTTGTCTACTCTGTGACCCTGCTTTTTCG  
 GCAGTCTCGGCTCCCAGGGCGCTCCGGATCCCTGCTCACAGACACCAC  
 CCCACGAGTCTCGCTCACTTCCGCGCCACTGTGTGGCTTGGCCGCA  
 GACCGGGTGGTGAACCGCCAGCTCGGAAACTGGTGGTTTGTAGTA  
 GAGCCGGACCTGAACTGCTTGGTAAAGAGGAGCCGCGCTCGCTCCCGGC  
 CAAGTCACTTTGGGATCTGTACCAAAGGCGTCCGACAGAAAGCGCT  
 AAGACTCAGAGAACTCTAATTGCAGCAAGCTCACTTCTGCTGAGATCA  
 AAGTCCCCATGTTTAGGACCTTGGGGCCAGAAGGAGTAGTGTATAAGT  
 GGCAAATTGCTGCTGCGGTGCGGGTGGCT

--- Predicted binding cite    S1    S2  
 — Exon    S3    S4

B

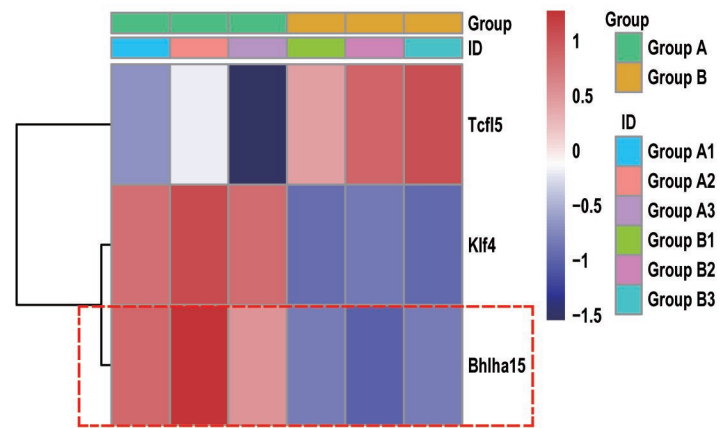

C

### ssAAV.CAG.mBhlha15-3FLAG-P2A-mCherry.WPRE.SV40pA

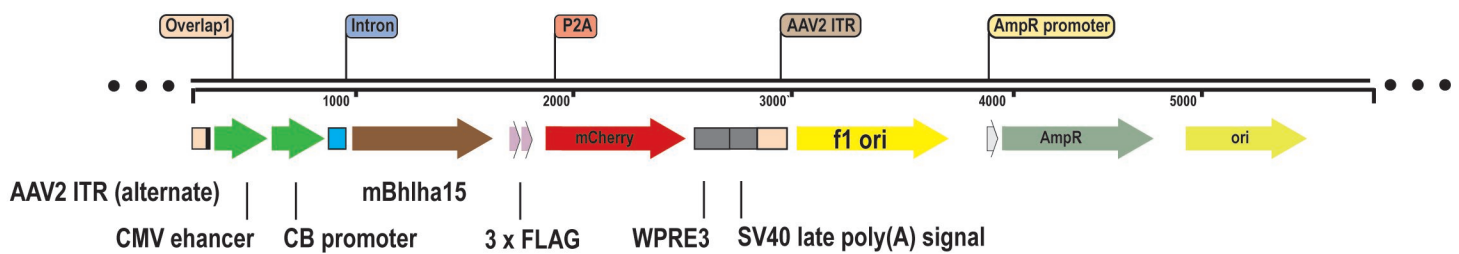

### ssAAV.CAG.mBhlha15-3FLAG-P2A-mCherry.WPRE.SV40pA

5062 bp

### ssAAV.CAG.mCherry.WPRE.SV40pA

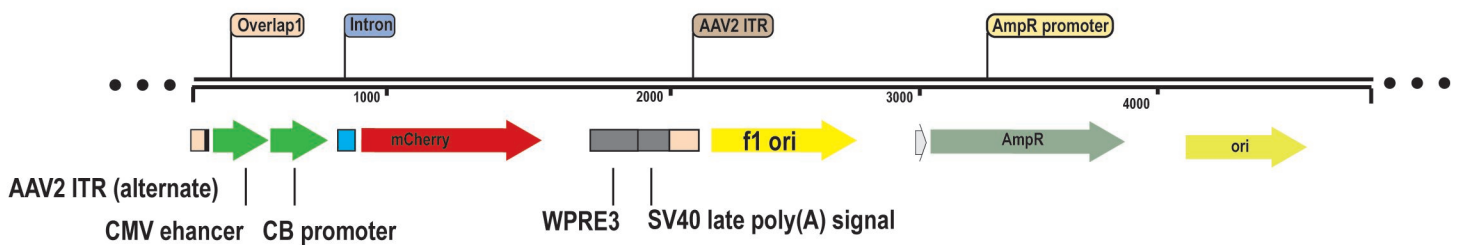

### EA02 ssAAV.CAG.mCherry.WPRE.SV40pA

4873 bp

D

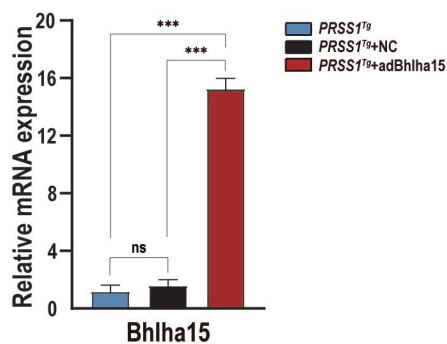

E

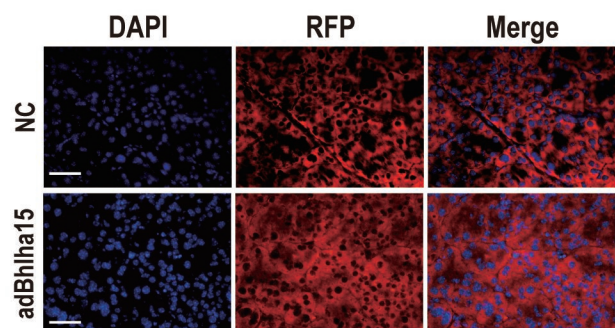

Supplement: 41419_2022_5322_MOESM6_ESM.pdf [file 41419_2022_5322_MOESM6_ESM.pdf]
